# Supplementary material
Source: PubMed Central journal article supplement (PMC6310134)
Supplement: NIHMS1001641-supplement-1.pdf [file NIHMS1001641-supplement-1.pdf]

## Appendix

## Supplementary Table 1

Least squares means for the association between *in utero* tobacco smoke exposure and MetS components in male and female adolescents [mean (95% CI)]

| Cardiometabolic outcomes | Females                   |                          | Males                     |                          | Significance of interaction by sex |
|--------------------------|---------------------------|--------------------------|---------------------------|--------------------------|------------------------------------|
|                          | Mom nonsmoker             | Mom smoker               | Mom nonsmoker             | Mom smoker               |                                    |
| Model 1 <sup>†</sup>     |                           |                          |                           |                          |                                    |
| BMI (percentile)         | <b>64.0 (62.5, 65.5)*</b> | <b>70.1 (66.7, 73.4)</b> | <b>63.6 (62.1, 65.1)*</b> | <b>72.6 (69.4, 75.8)</b> | <i>P</i> = .27                     |
| WC (percentile)          | <b>78.0 (77.4, 78.7)*</b> | <b>81.0 (79.3, 82.8)</b> | <b>78.0 (77.4, 78.7)*</b> | <b>81.1 (79.5, 82.8)</b> | <i>P</i> = .93                     |
| HDL (mg/dL)              | <b>52 (51, 53)</b>        | <b>50 (48, 51)</b>       | 52 (51, 52)               | 51 (49, 53)              | <b><i>P</i> = .20</b>              |
| Total TG (mg/dL)         | 72 (69, 74)               | 76 (69, 83)              | 72 (70, 75)               | 71 (66, 77)              | <i>P</i> = .21                     |
| SBP (percentile)         | <b>41.6 (40.2, 43.0)*</b> | <b>46.7 (42.6, 50.9)</b> | <b>41.6 (40.2, 43.0)*</b> | <b>46.8 (43.4, 50.2)</b> | <i>P</i> = .98                     |
| DBP (percentile)         | 37.5 (35.7, 39.2)         | 39.3 (35.6, 42.9)        | 37.7 (35.9, 39.4)         | 38.2 (34.9, 41.5)        | <i>P</i> = .65                     |
| Fasting glucose (mg/dL)  | 95 (94, 96)               | 94 (91, 96)              | 95 (94, 96)               | 93 (92, 96)              | <i>P</i> = .54                     |
| Age at menarche (y)      | <b>11.7 (11.7, 11.8)*</b> | <b>11.6 (11.4, 11.7)</b> | —                         | —                        |                                    |

DBP = diastolic blood pressure; HDL = high-density lipoprotein; PIR, Poverty Income Ratio; SBP = systolic blood pressure; TG = total triglycerides; WC = waist circumference.

\* *P* ≤ .05 for mean difference comparing adolescents exposed to *in utero* smoke exposure to unexposed adolescents of the same sex. The bold simply emphasized that these variables had significant differences.<sup>†</sup> Adjusted for adolescent age, maternal age, and race/ethnicity.

## Supplementary Table 2

Odds ratios (95% CI) for the association between *in utero* tobacco smoke exposure and MetS components in male and female adolescents

| Cardiometabolic outcomes                  | Model 1 <sup>†</sup>      |                           |
|-------------------------------------------|---------------------------|---------------------------|
|                                           | Females OR (95% CI)       | Males OR (95% CI)         |
| MetS                                      | 0.94 (0.33, 2.70)         | <b>2.48* (1.19, 5.20)</b> |
| Waist circumference >90th percentile      | <b>1.51* (1.07, 2.14)</b> | <b>1.86* (1.32, 2.62)</b> |
| Weight categories                         |                           |                           |
| Overweight (BMI ≥ 85th percentile)        | 1.40 (0.85, 2.31)         | 1.56 (0.98, 2.49)         |
| Obese (BMI ≥ 95th percentile)             | 1.39 (0.82, 2.36)         | <b>1.74* (1.10, 2.77)</b> |
| HDL <40 mg/dL                             | 0.97 (0.62, 1.50)         | 1.28 (0.88, 1.87)         |
| Triglycerides >110 mg/dL                  | 1.39 (0.81, 2.36)         | 1.26 (0.81, 1.97)         |
| Systolic or diastolic BP >90th percentile | 0.72 (0.39, 1.34)         | 1.32 (0.81, 2.15)         |
| Fasting glucose >100 mg/dL                | 1.69 (0.90, 3.17)         | 0.75 (0.42, 1.33)         |

BP = blood pressure; HDL = high-density lipoprotein; PIR = Poverty Income Ratio.

\* *P* ≤ .05 for OR comparing adolescents exposed to *in utero* smoke exposure to unexposed adolescents of the same sex. The bold simply emphasized that these variables had significant differences.<sup>†</sup> Adjusted for adolescent age, maternal age, and race/ethnicity.
